# Supplementary material
Source: publisher figshare collection journal article supplement (https://frontiersin.figshare.com/ndownloader/files/23660027)

# Supplemental digital content

## Figures

SDC Figure 1

A

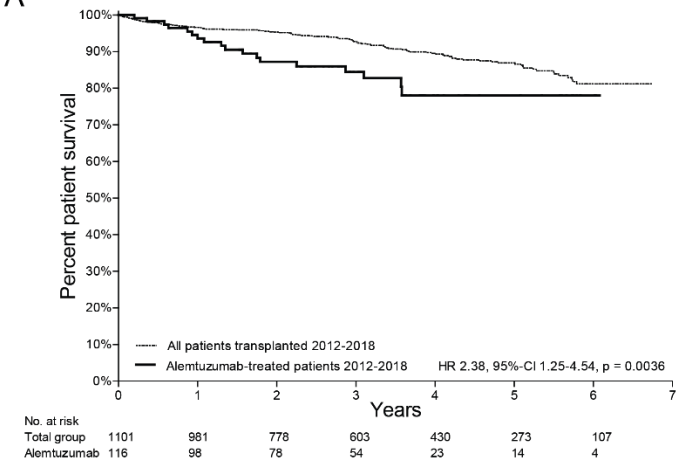

B

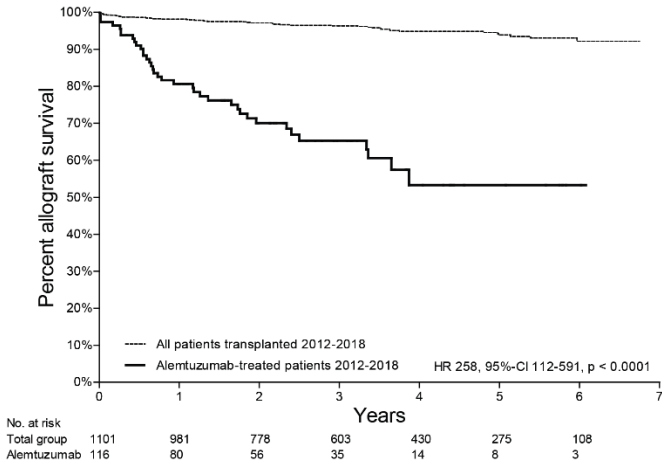

C

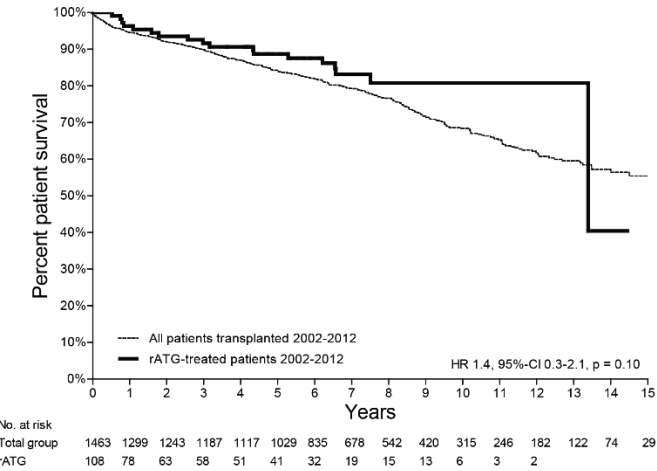

D

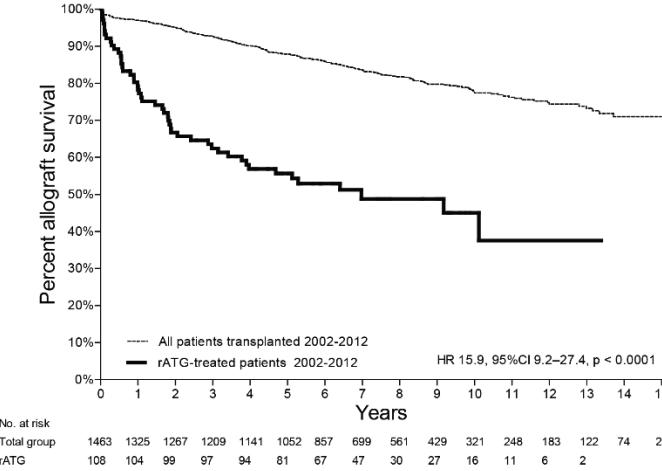

SDC Figure 2

A

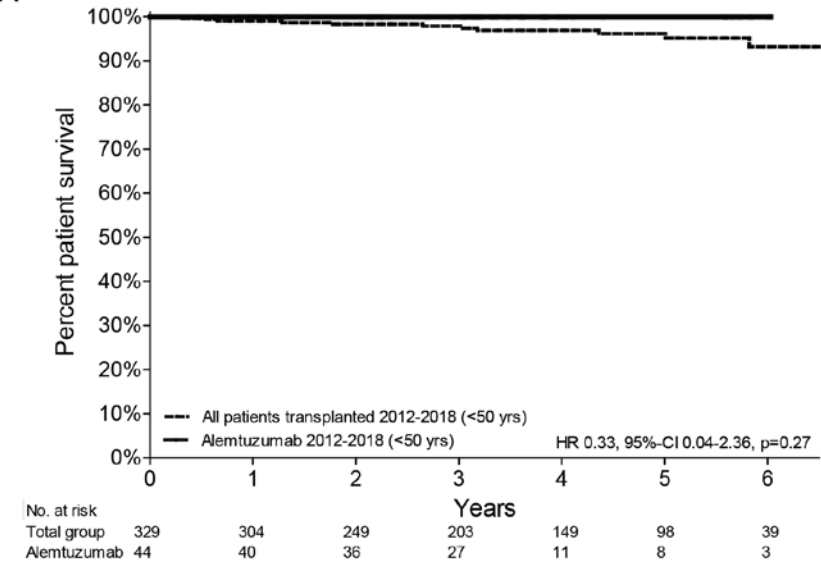

B

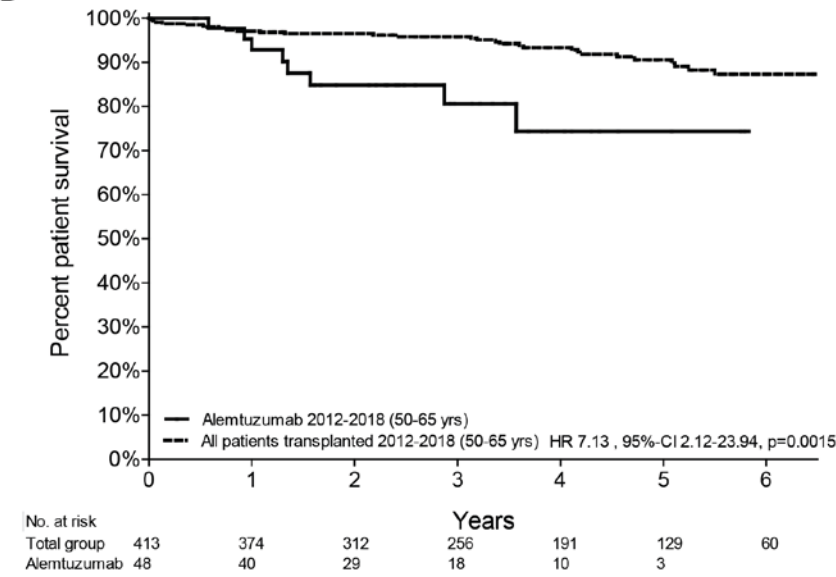

C

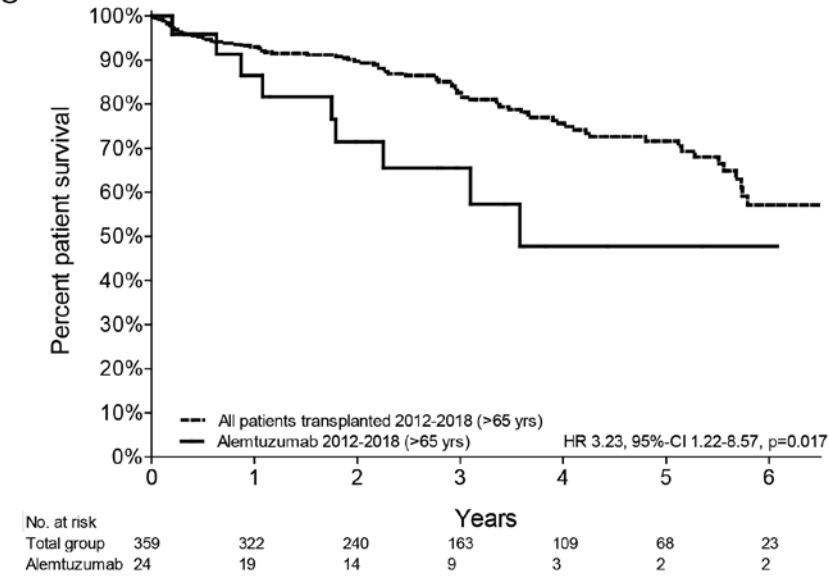

SDC Figure 3

A

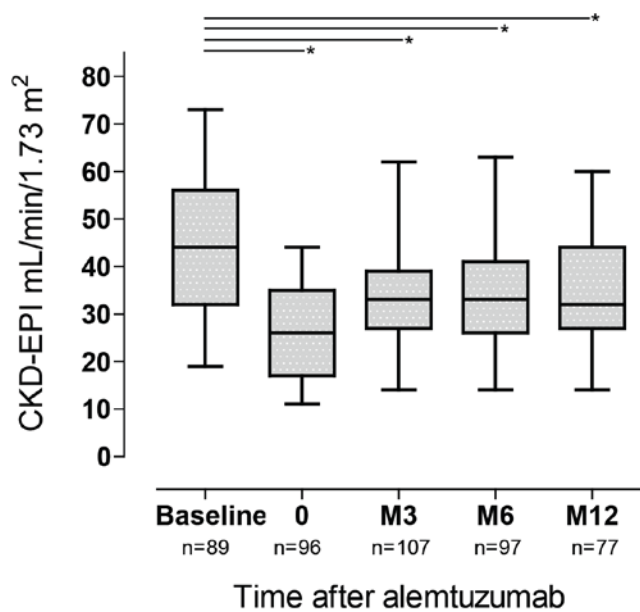

B

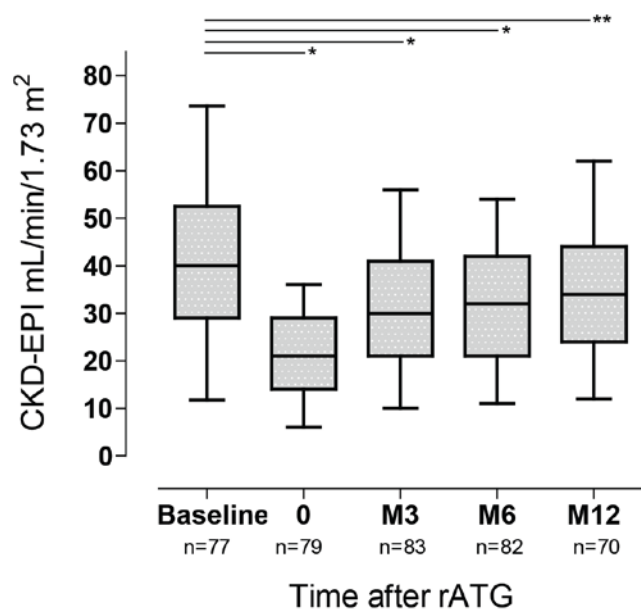

## Methods

Of patients treated with alemtuzumab or rATG the allograft function (estimated glomerular filtration rate (eGFR; Chronic Kidney Disease Epidemiology Collaboration [CKD-EPI]<sup>1</sup>) was assessed. Baseline eGFR was defined as the highest eGFR in the three months prior to AR. Delayed graft function (DGF) was defined as need for dialysis in the first week after transplantation. A linear mixed-effect model with patient specific random intercepts was constructed to analyze eGFR over time. Gender, ethnicity, primary kidney disease, age and donor type were included as covariates in the mixed effect model.

## Results

Kidney function one year after alemtuzumab treatment was significantly worse compared to baseline kidney function. A good response (i.e. a return to >75% of baseline eGFR one year after alemtuzumab treatment) was seen in 46% of alemtuzumab-treated patients. Twenty-three percent of the patients had a partial response (return to 50-75% of baseline eGFR) after alemtuzumab, and 31% of the patients showed no response (return to baseline <50% of eGFR). Thirty-three patients (28.4%) had DGF during AR. Eight of these 33 patients lost their allograft in the first year, including six patients with PNF. Serum creatinine of the remaining patients with DGF one year after alemtuzumab was 147  $\mu$ mol/L (IQR 141-165).

## References

1. Levey AS, Stevens LA, Schmid CH, et al. A new equation to estimate glomerular filtration rate. Ann Intern Med. 2009;150(9):604-612.

SDC Figure 4

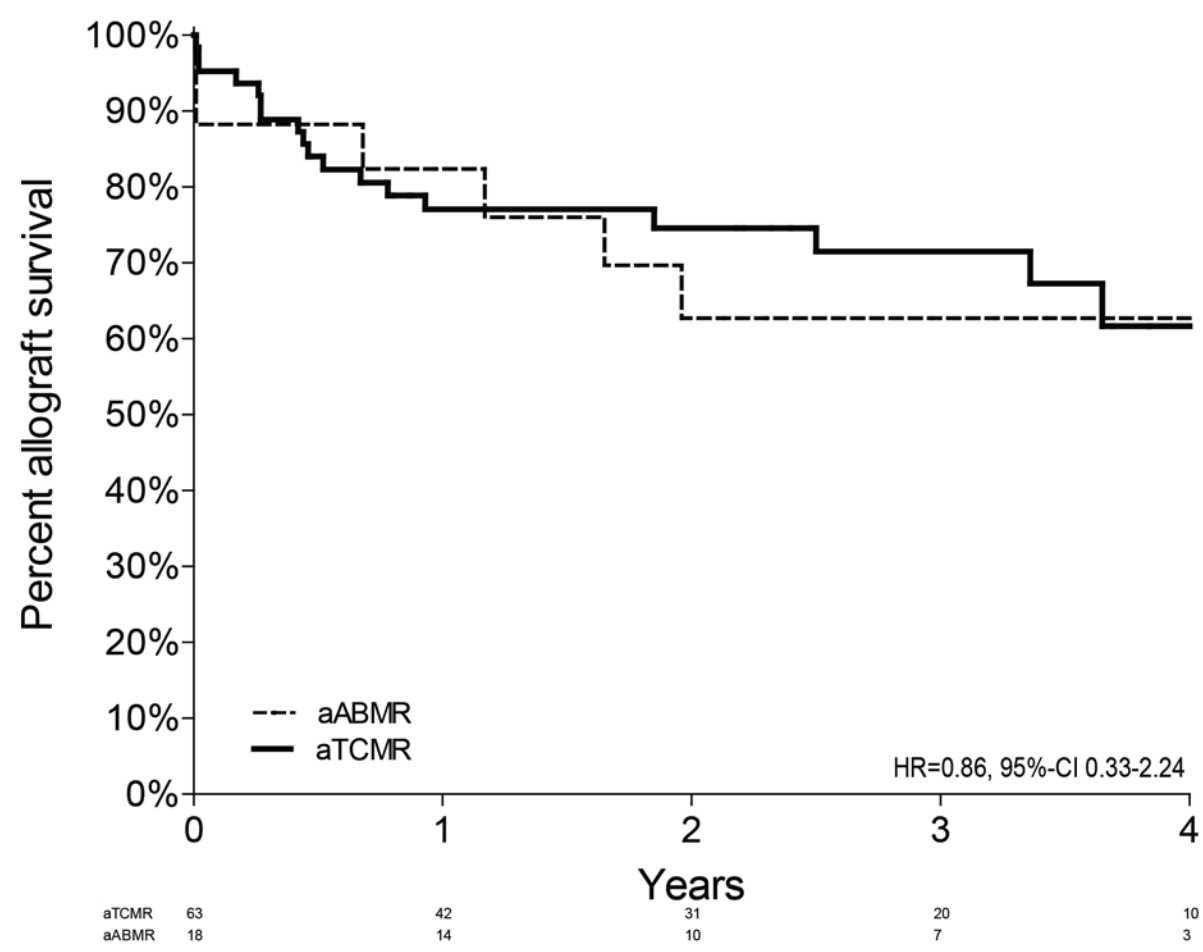

SDC Figure 5

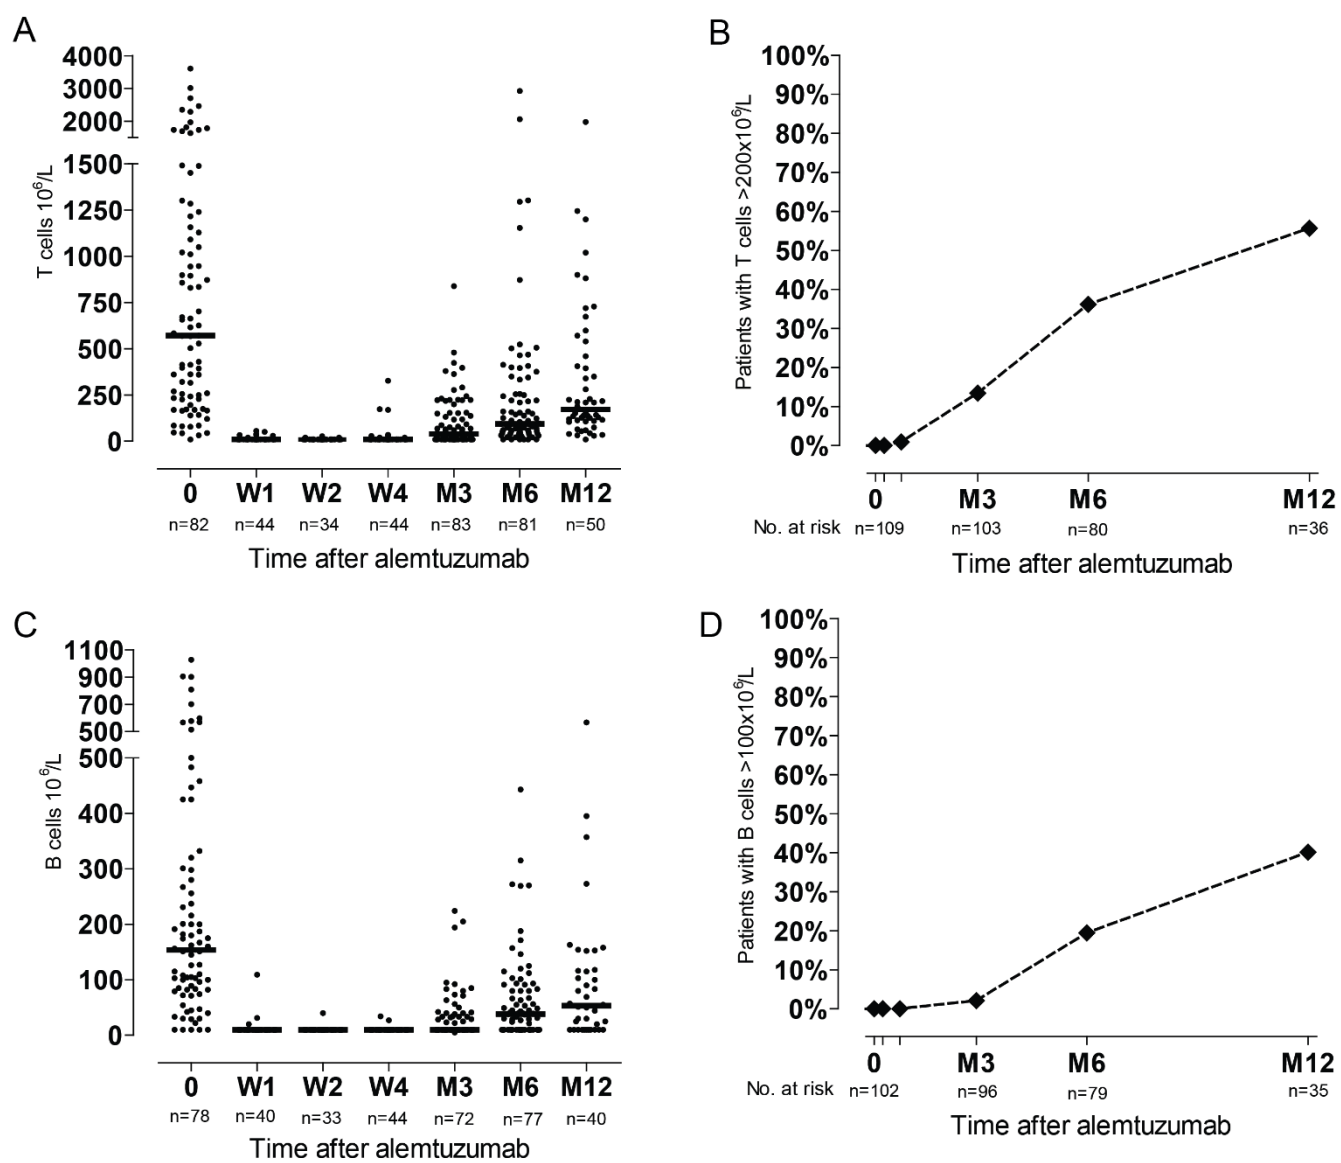

Supplement: Supplementary file [file 23660027]
